# Supplementary material for: Dihydro-sphingosine 1-phosphate interacts with carrier proteins in a manner distinct from that of sphingosine 1-phosphate
Source: PubMed Central journal article supplement (PMC6209608; doi:10.1042/bsr20181288), 2018-10-31
Supplement: bsr20181288_Supp1.pdf [file bsr20181288_Supp1.pdf]

**Supplementary Table 1.**

---

|         | S1P (nM) | DH-S1P (nM) | C <sub>17</sub> S1P (nM) | C <sub>17</sub> DH-S1P (nM) |
|---------|----------|-------------|--------------------------|-----------------------------|
| Average | 1027.6   | 411.8       | 1041.1                   | 1023.9                      |
| SD      | 98.4     | 38.6        | 99.5                     | 94.0                        |
| CV (%)  | 9.6      | 9.4         | 9.6                      | 9.2                         |

---

Validation of sphingolipid measurements using HPLC.

# Supplementary Figure 1

**A S1P**

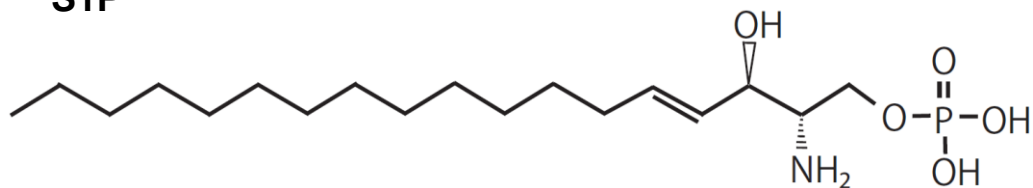

**B DH-S1P**

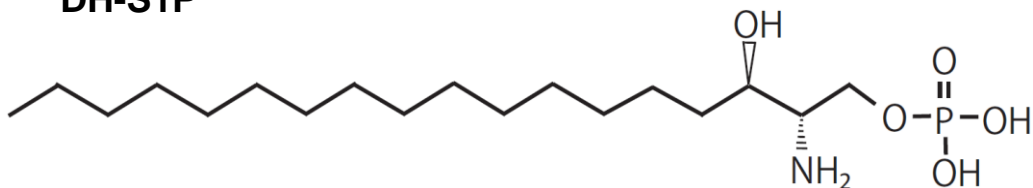

**Supplemental Figure 1. The structures of S1P and DH-S1P.**

## Supplementary Figure 2

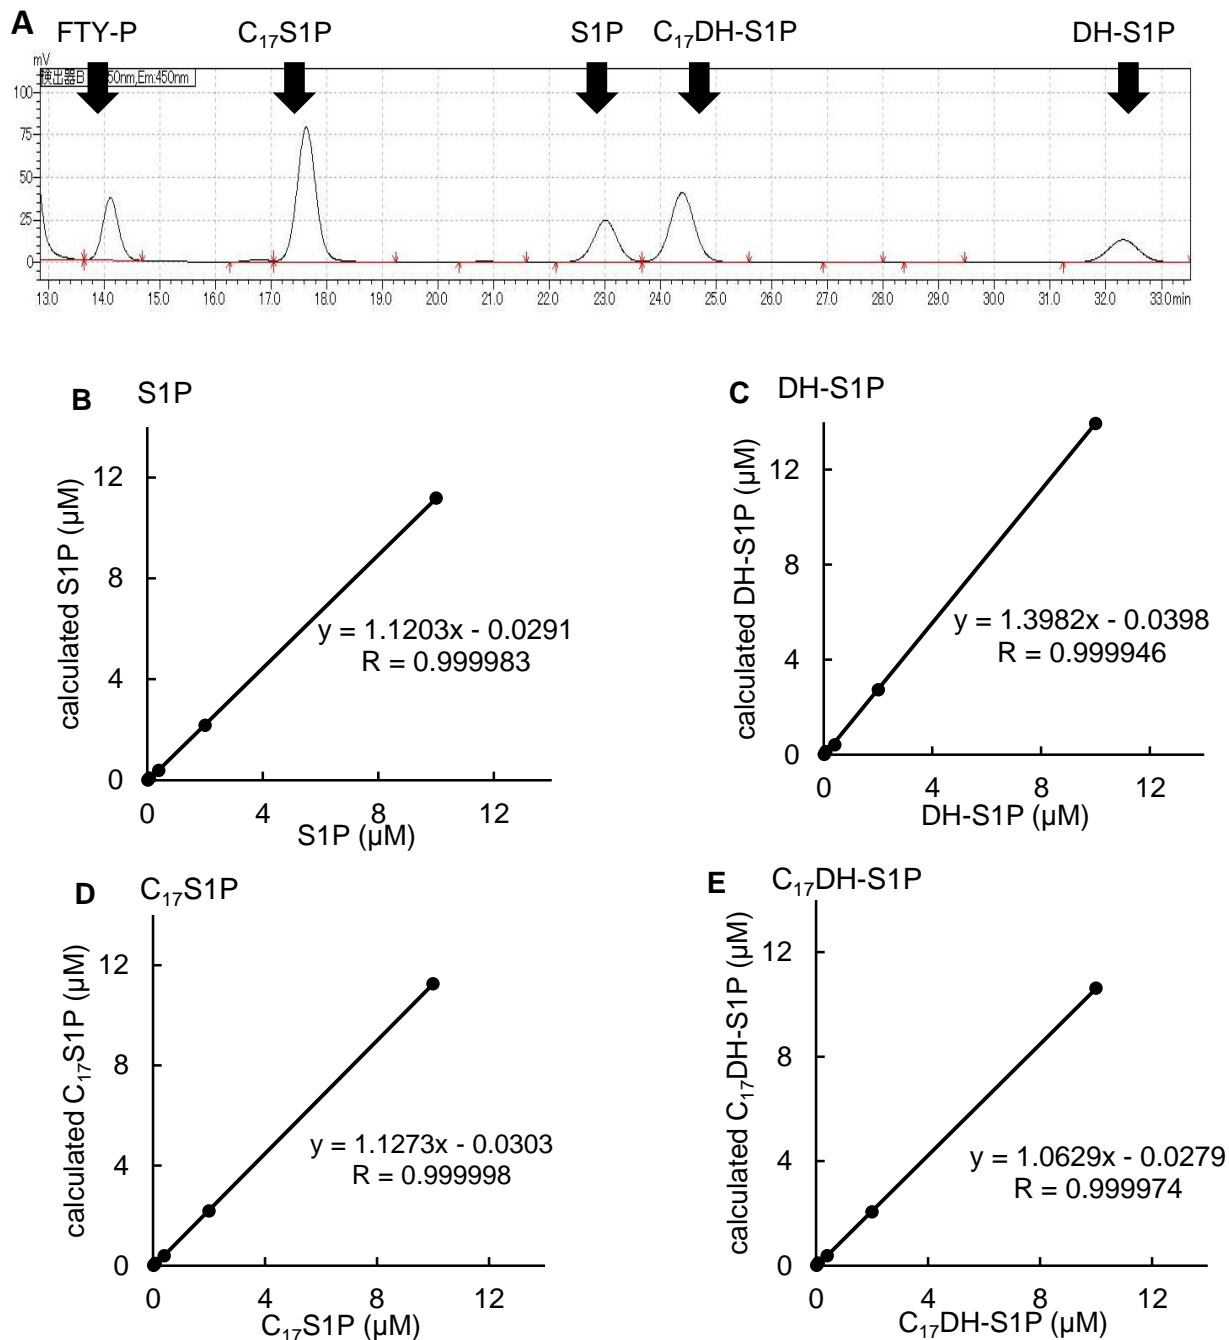

**Supplementary Figure 2. Linearity of sphingolipid measurements.** (A) Representative chromatograms obtained using an HPLC method to measure sphingolipid levels. The linearity of (B) S1P, (C) DH-S1P, (D) C<sub>17</sub>S1P, and (E) C<sub>17</sub>DH-S1P was observed using 0.016 μM, 0.08 μM, 0.4 μM, 2.0 μM, and 10 μM standard samples (n = 4).
